# Supplementary material for: Analysis of microbiota in elderly patients with Acute Cerebral Infarction
Source: PubMed Central journal article supplement (PMC6571007; doi:10.7717/peerj.6928), 2019-06-12

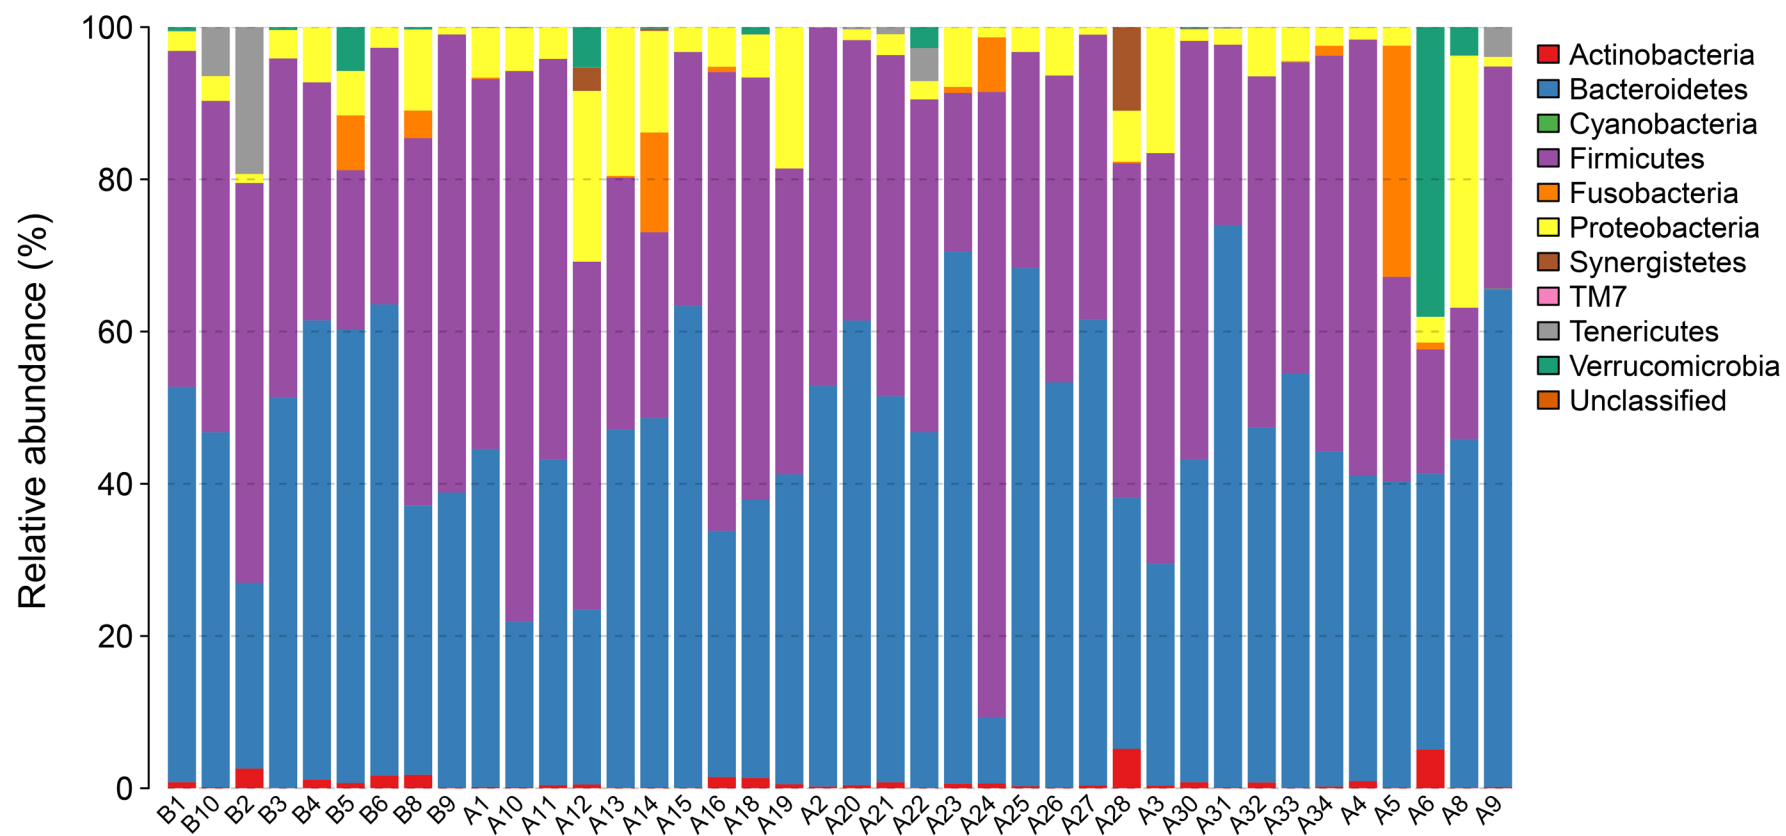

Supplement: peerj-07-6928-s006.pdf [file peerj-07-6928-s006.pdf]
